# Supplementary material for: Geometric Anatomy Basis for Safe and Effective Focal Ablation of Prostate Cancer by Irreversible Electroporation (IRE)
Source: MDPI journal article supplement (doi:10.3390/anatomia2030021), 2023-08-04

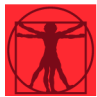

## Supplement Material:

### Supplement S1

Configuration of an equilateral triangle using 3 needles. The therapeutic electric field around the lines between the electrodes extends outwards by approximately 5mm.

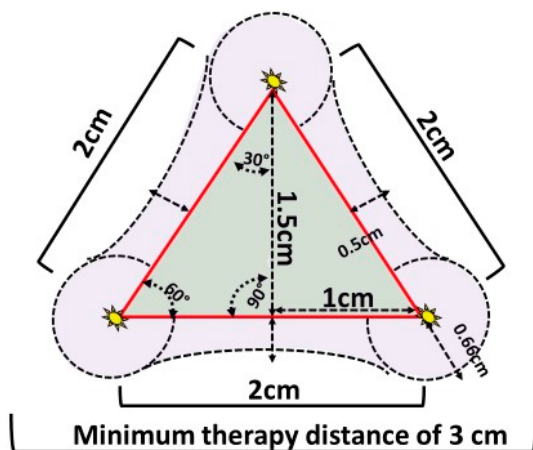

### Supplement S2:

Table of correspondence between cathetus distances (A & B) and hypotenuse distance C

|   |      | B    |      |      |      |      |      |      |      |  |
|---|------|------|------|------|------|------|------|------|------|---------------------------------------------------------------------------------------|
| A | C mm | 10   | 11   | 12   | 13   | 14   | 15   | 16   | 17   |                                                                                       |
|   | 10   | 14,1 | 14,9 | 15,6 | 16,4 | 17,2 | 18,0 | 18,9 | 19,7 |                                                                                       |
|   | 11   | 14,9 | 15,6 | 16,3 | 17,0 | 17,8 | 18,6 | 19,4 | 20,2 |                                                                                       |
|   | 12   | 15,6 | 16,3 | 17,0 | 17,7 | 18,4 | 19,2 | 20,0 | 20,8 |                                                                                       |
|   | 13   | 16,4 | 17,0 | 17,7 | 18,4 | 19,1 | 19,8 | 20,6 | 21,4 |                                                                                       |
|   | 14   | 17,2 | 17,8 | 18,4 | 19,1 | 19,8 | 20,5 | 21,3 | 22,0 |                                                                                       |
|   | 15   | 18,0 | 18,6 | 19,2 | 19,8 | 20,5 | 21,2 | 21,9 | 22,7 |                                                                                       |
|   | 16   | 18,9 | 19,4 | 20,0 | 20,6 | 21,3 | 21,9 | 22,6 | 23,3 |                                                                                       |
|   | 17   | 19,7 | 20,2 | 20,8 | 21,4 | 22,0 | 22,7 | 23,3 | 24,0 |                                                                                       |

Supplement S3: Tumours with a length <10 mm could be readily covered with simple triangular shapes.

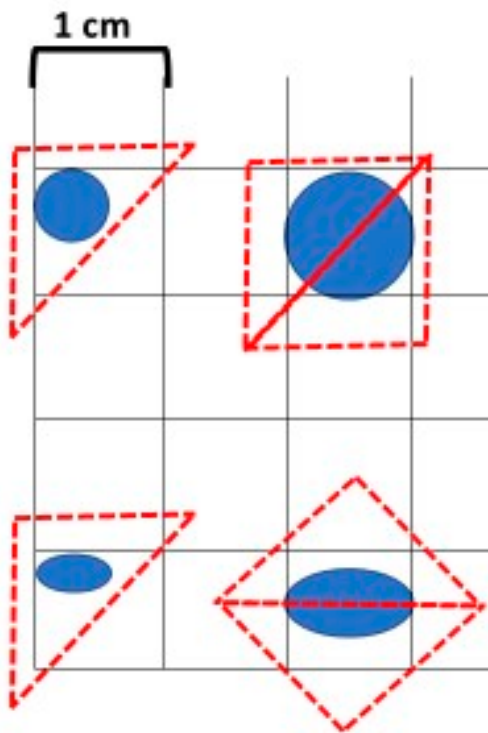

Supplement S4: Axial, sagittal and parasagittal view of prostate according to low (30cc), intermediate (55cc) and high (80cc) volumes.

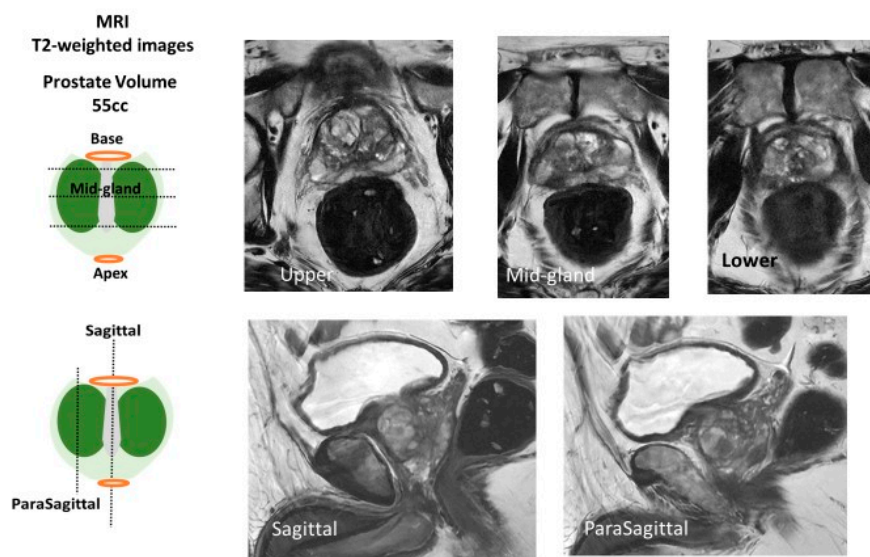

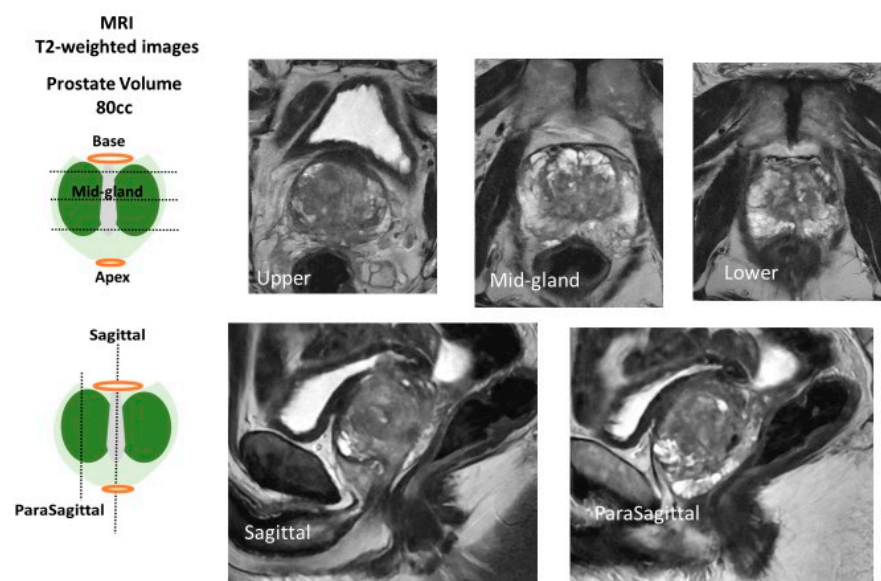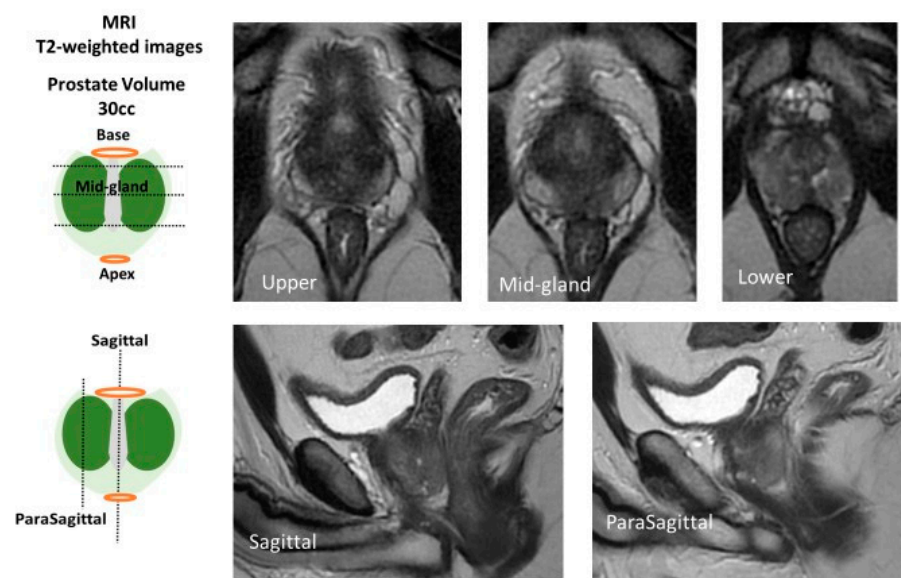

Supplement: s1 [file s1]
